# Supplementary material for: Contact tracing in the context of COVID-19: a case study from Oman
Source: PubMed Central journal article supplement — BMJ Glob Health. 2022 Jun 23;7(Suppl 3):e008724. doi: 10.1136/bmjgh-2022-008724 (PMC9226467; doi:10.1136/bmjgh-2022-008724), 2022-06-23
Supplement: bmjgh-2022-008724supp001.pdf [file bmjgh-2022-008724supp001.pdf]

*Annex 1: Key informant interview questionnaire*

| Theme                                                         | Questions                                                                                                                                                              |
|---------------------------------------------------------------|------------------------------------------------------------------------------------------------------------------------------------------------------------------------|
| <b>1. Setting</b>                                             | Describe the institution(s) or organization(s) that manage(s) contact tracing activities                                                                               |
| <b>2. Methods and procedures for COVID-19 contact tracing</b> | What is the definition of a case that will generate contact tracing activity?                                                                                          |
|                                                               | Are contacts prioritized for follow-up and quarantine? If yes, what algorithm is used?                                                                                 |
|                                                               | What is the definition of a contact who should be quarantined?                                                                                                         |
|                                                               | What is the duration of quarantine for a contact?                                                                                                                      |
|                                                               | Are there standard operating procedures to identify contacts (including investigation form)? If yes, can you share                                                     |
|                                                               | Who investigates contacts (contact tracers, clinicians, other)?                                                                                                        |
|                                                               | How are contacts investigated (direct face-to-face, telephone, web application, others/specify)?                                                                       |
|                                                               | How are contact data collected (paper-pencil, direct entry into system, other devices)?                                                                                |
|                                                               | What platform is used for data entry and management and why was that platform selected?                                                                                |
|                                                               | Are digital tools utilized for detecting and/or monitoring COVID-19 contacts?                                                                                          |
| <b>3. Human resources for COVID-19 contact tracing</b>        | Has there been an increase in resources to adjust to the current epidemic?                                                                                             |
|                                                               | Are communities/CHWs engaged in workforce surge for contact tracing?                                                                                                   |
|                                                               | What is the average number of contacts per case?                                                                                                                       |
|                                                               | Are there contingencies for contact tracing priorities in case community transmission is re-established?                                                               |
| <b>4. Isolation and quarantine</b>                            | Are there written standard operating procedures for isolation and quarantine? If yes, can you share a copy?                                                            |
|                                                               | How is compliance with isolation or quarantine monitored?                                                                                                              |
| <b>5. Data management and analysis</b>                        | What platform(s) are utilized for entering and managing the case and contact data?                                                                                     |
|                                                               | Are there levels of privilege in order to protect the privacy of cases and contacts?                                                                                   |
| <b>6. Information technology</b>                              | Do cases or contacts have access to an online platform to update their data or find information?                                                                       |
| <b>7. Communication and ethical aspects</b>                   | Are there communication guidelines (procedure for contacting cases or contacts, questioning, explaining recommendations and procedures)? If yes, can you share a copy? |
|                                                               | How are communities communicated with in regards to contact tracing activities and their role in supporting their success?                                             |
